# Supplementary material for: In-Silico Modeling of the Mitotic Spindle Assembly Checkpoint
Source: PubMed Central journal article supplement (PMC2215771; doi:10.1371/journal.pone.0001555), 2008-02-06
Supplement: pone.0001555.s001.pdf [file pone.0001555.s001.pdf]

## B- ODEs of <sup>M</sup>SAC model Convey variant
